# Supplementary material for: A new indium selenide phase: controllable synthesis, phase transformation and photoluminescence properties
Source: Royal Society of Chemistry journal article supplement (doi:10.1039/c9tc04635f), 2019-01-01
Supplement: c9tc04635f2.xlsx [file c9tc04635f2.xlsx]

## Sheet: Sheet1
2.1839	47349.6
2.18765	46581.1
2.19141	47441
2.19516	46473.5
2.19891	47495.1
2.20267	46255
2.20642	47035.9
2.21018	45665.4
2.21393	47334.4
2.21768	45596
2.22144	46729.5
2.22519	45794.4
2.22895	46856.2
2.2327	45966.4
2.23645	46875.1
2.24021	45700.4
2.24396	46874.8
2.24772	45965.7
2.25147	46121.6
2.25523	45662.9
2.25898	46150.3
2.26274	45184.2
2.26649	46426.5
2.27024	45382.4
2.274	46391.9
2.27775	45207.2
2.28151	46316.6
2.28526	44802.2
2.28902	46213.3
2.29277	45064.4
2.29653	45731.1
2.30028	45144.7
2.30403	46348.7
2.30779	44699.8
2.31155	45651.8
2.3153	44373.1
2.31905	45346.8
2.32281	44665.4
2.32656	45383.9
2.33032	44425.8
2.33407	45552.6
2.33783	44207.6
2.34158	45822.8
2.34534	44292.8
2.34909	45530.6
2.35285	43634
2.3566	45059.2
2.36036	44019.1
2.36411	44971
2.36787	44070.7
2.37162	44966.4
2.37538	44114.9
2.37913	44527.6
2.38289	43873.6
2.38664	45102
2.3904	43625.5
2.39415	45030.4
2.39791	43259.5
2.40166	44765.4
2.40542	43622.6
2.40917	44145.3
2.41293	43684.6
2.41668	44382.3
2.42044	43351
2.42419	44389.1
2.42795	43595.8
2.43171	43769.8
2.43546	43320.6
2.43921	44339
2.44297	43142.1
2.44673	44313.4
2.45048	42947.7
2.45424	43672.8
2.45799	43145.1
2.46175	43379.9
2.4655	42893.1
2.46926	43654
2.47301	42563.3
2.47677	44069.5
2.48053	43263.2
2.48428	43830
2.48804	42476.9
2.49179	43223.8
2.49555	42831.1
2.4993	43039.6
2.50306	42667.8
2.50681	43442.8
2.51057	41903
2.51432	43342.7
2.51808	42188.8
2.52184	43295.4
2.52559	42092.1
2.52935	42973.4
2.5331	42066
2.53686	43130.5
2.54062	42366.1
2.54437	43182.4
2.54813	42296.5
2.55188	43096.3
2.55564	41951.9
2.55939	42485.6
2.56315	42005
2.56691	42731.5
2.57066	41757.2
2.57442	42715.7
2.57817	41718.3
2.58193	42639.7
2.58569	41815.2
2.58944	43219.8
2.5932	41682.2
2.59695	42499.4
2.60071	41386.4
2.60447	42346
2.60822	41547.4
2.61198	42067.2
2.61574	40843.1
2.61949	41860.1
2.62325	40869.2
2.627	42410.6
2.63076	41343.5
2.63452	42122
2.63827	41111.7
2.64203	42243.8
2.64579	41308.9
2.64954	42046.5
2.6533	41394.3
2.65705	42035.8
2.66081	41018.1
2.66457	42088.6
2.66832	40868.6
2.67208	41919
2.67584	41238.3
2.67959	41497
2.68335	41369.2
2.68711	41826.8
2.69086	40964.7
2.69462	42157.6
2.69838	40527.2
2.70213	41368.3
2.70589	40634.7
2.70965	41490.2
2.7134	40847.6
2.71716	41594.8
2.72092	40597.3
2.72467	42008
2.72843	40830.3
2.73218	41749.6
2.73594	41005.4
2.7397	41291
2.74346	40570
2.74721	41254.1
2.75097	40698.4
2.75473	41255
2.75848	40470.9
2.76224	41161.1
2.766	40057.9
2.76975	40882.1
2.77351	40013.5
2.77727	41352.4
2.78102	40007.8
2.78478	41173.8
2.78854	40266.5
2.79229	41073.7
2.79605	39365.1
2.79981	41132.1
2.80356	40281.6
2.80732	40797.8
2.81108	39866.5
2.81484	41077.8
2.81859	39881.1
2.82235	40605.6
2.82611	39731.4
2.82986	40623.2
2.83362	39693.1
2.83738	40496.7
2.84114	39516.7
2.84489	40720.4
2.84865	39817.7
2.85241	40784.1
2.85616	39668.2
2.85992	40185.5
2.86368	39753.3
2.86744	40588.7
2.87119	39169.3
2.87495	40683.1
2.87871	39578.9
2.88246	40034.8
2.88622	39137.7
2.88998	40174.9
2.89374	39848.4
2.89749	40177.3
2.90125	38974.3
2.90501	40058.9
2.90877	39213.3
2.91252	39748
2.91628	39307.5
2.92004	40152.6
2.9238	39305.2
2.92755	39860.9
2.93131	39181.7
2.93507	40059.5
2.93883	39177.5
2.94258	40087.9
2.94634	38836.4
2.9501	39551.9
2.95385	38721.4
2.95761	39852.6
2.96137	38539.4
2.96513	39690.8
2.96889	38589.1
2.97264	39566.1
2.9764	38476.8
2.98016	39545
2.98392	38829.9
2.98767	39384.6
2.99143	38491.5
2.99519	39747.3
2.99895	38503.2
3.00271	39296.8
3.00646	38468.6
3.01022	39483.5
3.01398	38790.4
3.01774	39185.1
3.02149	38577
3.02525	39258.6
3.02901	38425.9
3.03277	38839
3.03653	38020.6
3.04028	38735
3.04404	38080.9
3.0478	38658.4
3.05156	38299.3
3.05531	39259.2
3.05907	38260.2
3.06283	38929.9
3.06659	38280.6
3.07035	39672
3.0741	37998
3.07786	38911.6
3.08162	38091.2
3.08538	39249.1
3.08914	38186.8
3.09289	38714.4
3.09665	37898.1
3.10041	38875.4
3.10417	38195.2
3.10793	38415.6
3.11169	37980.3
3.11544	38945.7
3.1192	38085.8
3.12296	38402.1
3.12672	37735
3.13048	38447.8
3.13423	37626.6
3.13799	39181.1
3.14175	37782.3
3.14551	38450.8
3.14927	37586.2
3.15303	38576.1
3.15678	37698.6
3.16054	38356.1
3.1643	37685.9
3.16806	38433.6
3.17182	37189.4
3.17557	38495.6
3.17933	37676.6
3.18309	38400
3.18685	37389.3
3.19061	38478.3
3.19437	37489.6
3.19813	38072.9
3.20188	37500.9
3.20564	38297.6
3.2094	37183.3
3.21316	37981.8
3.21692	37336.9
3.22068	37656.8
3.22443	36953.5
3.22819	37665.3
3.23195	37234.5
3.23571	38380.5
3.23947	36809.5
3.24323	37996.9
3.24699	37101.1
3.25074	38006.4
3.2545	37379.2
3.25826	38203.7
3.26202	36952.1
3.26578	38231.6
3.26954	36930.1
3.2733	38106.2
3.27705	37088.3
3.28081	37886.5
3.28457	37195.6
3.28833	37519.7
3.29209	37022.9
3.29585	37784.8
3.29961	36970.4
3.30336	37462.5
3.30712	37129.1
3.31088	37906
3.31464	36440.4
3.3184	37869.3
3.32216	36678.4
3.32592	37304.9
3.32968	36607.9
3.33344	36896.6
3.33719	36788.8
3.34095	37772.8
3.34471	36468.2
3.34847	37414.9
3.35223	36909.6
3.35599	37282.7
3.35975	36363.4
3.36351	37280.4
3.36727	36649.1
3.37102	36981.2
3.37478	35971.7
3.37854	37125.8
3.3823	36190
3.38606	37318.2
3.38982	36886.3
3.39358	37137.7
3.39734	36327
3.4011	37206.5
3.40485	36342.6
3.40861	37203.4
3.41237	35969.6
3.41613	36999.6
3.41989	36406.8
3.42365	36896.9
3.42741	36325.8
3.43117	36899.1
3.43493	36461.2
3.43869	36923.1
3.44245	36192.9
3.4462	36957.9
3.44996	35956.3
3.45372	37112.7
3.45748	36139.3
3.46124	37192.1
3.465	36346.2
3.46876	36453.2
3.47252	36268.8
3.47628	36368.3
3.48004	35618.7
3.4838	36833.4
3.48756	36172.6
3.49131	36857
3.49507	35723.8
3.49883	36579.6
3.50259	36010
3.50635	36739.9
3.51011	35488.7
3.51387	36676.6
3.51763	35512.9
3.52139	36525.7
3.52515	35393.7
3.52891	36781.1
3.53267	35623.8
3.53643	36559.5
3.54019	35256.1
3.54394	36161.7
3.5477	35654.9
3.55146	36161.6
3.55522	35972.3
3.55898	36630.4
3.56274	35258.8
3.5665	36214
3.57026	35224.4
3.57402	36760.8
3.57778	35607
3.58154	36009.5
3.5853	35036
3.58906	36260.8
3.59282	35234.7
3.59658	36448.5
3.60034	35353.4
3.6041	36203.9
3.60785	34882.3
3.61161	36520.4
3.61537	35200.7
3.61913	35537
3.62289	35654.5
3.62665	35730.7
3.63041	35134.2
3.63417	35946.1
3.63793	34988.4
3.64169	35639.1
3.64545	35070.6
3.64921	36176.4
3.65297	35094
3.65673	35620.8
3.66049	34883.6
3.66425	35270.9
3.66801	34770.1
3.67177	36166.2
3.67553	35054.1
3.67929	35973.3
3.68305	35138.8
3.68681	36218.8
3.69057	35274.5
3.69433	35708.7
3.69809	34997.8
3.70185	35625.1
3.7056	34854.2
3.70937	35248.5
3.71312	34952.6
3.71688	35550.8
3.72064	34495.2
3.7244	35646.6
3.72816	35455.9
3.73192	35780.4
3.73568	34732.7
3.73944	35617
3.7432	35004.2
3.74696	35431.9
3.75072	34821.2
3.75448	35599.8
3.75824	34747.2
3.762	35920.5
3.76576	34839.5
3.76952	35355.2
3.77328	35164.9
3.77704	35486.3
3.7808	34420.2
3.78456	35574.2
3.78832	34890.8
3.79208	35735
3.79584	34458.8
3.7996	35449.1
3.80336	34447.1
3.80712	35509.1
3.81088	34229.9
3.81464	35508.6
3.8184	34654.5
3.82216	35494.5
3.82592	34893.4
3.82968	34670.4
3.83344	34371.4
3.8372	35460.6
3.84096	34129.4
3.84472	35202.5
3.84848	34328.7
3.85224	34761.6
3.856	34238.7
3.85976	35049.3
3.86352	34347.6
3.86728	35752.5
3.87104	34294.6
3.8748	34811.5
3.87856	34189.4
3.88232	34900.9
3.88608	34030.9
3.88984	34665.9
3.8936	33640.1
3.89736	34526.1
3.90112	34156.5
3.90488	34588.8
3.90864	34175.5
3.9124	34692.6
3.91616	33583.4
3.91992	34781.8
3.92368	33825.5
3.92744	34872.3
3.9312	33905.3
3.93496	34679.1
3.93872	33988.1
3.94248	34494.4
3.94624	33874.1
3.95	34991.9
3.95376	34264.4
3.95752	34618.1
3.96128	34040.7
3.96504	35045
3.9688	34154.5
3.97256	34779.5
3.97632	33619.5
3.98008	34494.7
3.98384	34258.9
3.9876	34668.5
3.99136	33876
3.99512	34478
3.99888	34166.5
4.00264	34495.8
4.0064	33755.2
4.01016	34768.6
4.01393	33412.2
4.01769	35165.6
4.02144	33903.4
4.0252	34913.4
4.02897	33798.5
4.03273	34440.4
4.03649	33947.6
4.04025	34684.4
4.04401	33417.3
4.04777	34260.5
4.05153	33534
4.05529	34274.7
4.05905	33364.6
4.06281	34466.7
4.06657	33686.4
4.07033	34364.6
4.07409	33477.6
4.07785	34401.6
4.08161	33944.7
4.08537	34479.6
4.08913	33230.9
4.09289	34205.5
4.09665	33651.3
4.10041	34584.2
4.10417	33450.1
4.10793	34576.6
4.11169	33182.3
4.11545	34278.9
4.11921	33476.4
4.12297	34196.4
4.12673	34030.1
4.13049	34057.9
4.13425	33643.3
4.13802	34154
4.14178	33108.4
4.14553	33968
4.1493	32903.3
4.15306	34107.9
4.15682	33291.6
4.16058	34123.1
4.16434	33222.4
4.1681	34019.6
4.17186	32916.8
4.17562	33921
4.17938	33350.7
4.18314	34291
4.1869	32938.9
4.19066	34238.8
4.19442	33513.2
4.19818	33974.6
4.20194	33139.4
4.2057	33930.6
4.20946	32987.1
4.21322	33632.5
4.21698	33356.5
4.22074	33791
4.2245	33280.5
4.22827	33532.6
4.23203	33176.1
4.23579	34362.6
4.23955	32853.8
4.24331	33863
4.24707	33332.3
4.25083	33255.3
4.25459	32848
4.25835	33611.5
4.26211	32874
4.26587	34150.9
4.26963	33010.6
4.27339	33735.9
4.27715	33078
4.28091	33926.5
4.28467	33439.3
4.28843	33735.6
4.29219	32790.9
4.29595	33532.4
4.29971	32628.1
4.30347	33661.7
4.30724	33032.7
4.311	33586.8
4.31476	32837.5
4.31852	33687.7
4.32228	32811.7
4.32604	33469.2
4.3298	33029.8
4.33356	33586.8
4.33732	32763.4
4.34108	33729.1
4.34484	32784.9
4.3486	33482
4.35236	33002.8
4.35612	33482.5
4.35988	32811.1
4.36364	33653.9
4.3674	33028.3
4.37116	33567.4
4.37493	33021.9
4.37868	33704.9
4.38245	32822.7
4.38621	33471.8
4.38997	33124.5
4.39373	33699.2
4.39749	33078.3
4.40125	33438.1
4.40501	33559.1
4.40877	34199.2
4.41253	33373.9
4.41629	34421.3
4.42005	33526.9
4.42381	34528.9
4.42757	33622.8
4.43133	34121.7
4.43509	34127.2
4.43886	34710.8
4.44262	34260.2
4.44638	35318.5
4.45014	35076.6
4.4539	35715.2
4.45766	35268.2
4.46142	35847
4.46518	35467
4.46894	36866.3
4.4727	35958.8
4.47646	36735.2
4.48022	36400.7
4.48398	37123.9
4.48774	36693.7
4.4915	37576.8
4.49526	36802.5
4.49902	37152.3
4.50279	36764.9
4.50655	37140.7
4.51031	35794.7
4.51407	36879.5
4.51783	35697.8
4.52159	35973.1
4.52535	34995.6
4.52911	35230.5
4.53287	34408.4
4.53663	34702.9
4.54039	34070.2
4.54415	34343.2
4.54791	33584.1
4.55167	33981.7
4.55543	33465.4
4.55919	33876
4.56295	33154.7
4.56672	33539.8
4.57048	32733.5
4.57424	32920
4.578	32374.9
4.58176	32913
4.58552	32267.8
4.58928	33007.1
4.59304	32322.6
4.5968	32787.4
4.60056	32363.9
4.60432	32867.5
4.60808	31970.4
4.61184	32793.4
4.6156	32029.6
4.61936	33013
4.62312	32013
4.62688	32218.8
4.63065	31884.8
4.63441	32648.9
4.63817	31791.3
4.64193	32727.9
4.64569	31747.9
4.64945	32676.2
4.65321	31663.4
4.65697	32554.3
4.66073	31521.4
4.66449	32413.4
4.66825	31551.1
4.67201	32425
4.67577	31368.4
4.67953	32240.3
4.68329	31737.7
4.68706	32474.3
4.69081	31523.2
4.69458	32528.7
4.69834	31584.7
4.7021	32503.2
4.70586	31611
4.70962	32052.1
4.71338	31441.7
4.71714	32464
4.7209	31639.5
4.72842	31350
4.73594	31376.4
4.7397	32116.7
4.74346	31134.5
4.74722	32089.3
4.75099	31353.2
4.75474	31976.8
4.75851	31208.4
4.76227	31937.3
4.76603	31085
4.76979	31648.3
4.77355	31104.8
4.77731	31863.3
4.78107	31737.8
4.78483	31843.9
4.78859	31170.8
4.79235	31883.8
4.79611	30801.3
4.79987	31880
4.80363	31359.6
4.80739	31905.1
4.81115	31134.2
4.81491	31478.2
4.81867	30880
4.82243	32040.6
4.8262	31203.5
4.82996	31553.8
4.83372	30482.9
4.83748	31355
4.84124	30856.6
4.845	31769
4.84876	30926.3
4.85252	31462.5
4.85628	30997.7
4.86004	31919.2
4.8638	30899.3
4.86756	31001.2
4.87132	30404.2
4.87508	31726.4
4.87884	30293.4
4.8826	31384.6
4.88636	30452.2
4.89013	31367.6
4.89389	31025.1
4.89764	31611.3
4.90141	31072.9
4.90517	31735.3
4.90893	30796.2
4.91269	31410.1
4.91645	30666.3
4.92021	31293.1
4.92397	30652.3
4.92773	31439.8
4.93149	30676.5
4.93525	31614.6
4.93901	30876.2
4.94277	31421.6
4.94653	30871.1
4.95029	31302.6
4.95405	30524.7
4.95781	31330.9
4.96157	30878.4
4.96533	31103.5
4.96909	30858.9
4.97286	31078.5
4.97661	30519.4
4.98038	31250.6
4.98414	30306.4
4.9879	31626.7
4.99166	30429.5
4.99542	31298.6
4.99918	30282.3
5.00294	31272.5
5.0067	30273.6
5.01046	30935
5.01422	30018.7
5.01798	31254.5
5.02174	30242.2
5.0255	31343.5
5.02926	30140.7
5.03302	31534.4
5.03678	30479
5.04054	30759.5
5.0443	30601.4
5.04806	31281.6
5.05182	30415.1
5.05558	30904.6
5.05934	30326.6
5.06311	31178.3
5.06687	30173.2
5.07062	30785
5.07439	30301
5.07815	30990.3
5.08191	30325.6
5.08567	31212
5.08943	30785
5.09319	31057.3
5.09695	30658.6
5.10071	31066.2
5.10447	30482.3
5.10823	31189.4
5.11199	30639.9
5.11575	30786.8
5.11951	30032.2
5.12327	31175.3
5.12703	30307.8
5.13079	31402.8
5.13455	30785.2
5.13831	31233.1
5.14207	30080.8
5.14583	31009.5
5.14959	30239.9
5.15335	31159.6
5.15711	30383.5
5.16087	30846.8
5.16463	30280.3
5.16839	30798.1
5.17215	30093.7
5.17591	30877.8
5.17967	30186
5.18343	30964.4
5.18719	29972.3
5.19095	30905.1
5.19471	30187.4
5.19847	30557.4
5.20223	30099
5.20599	30631
5.20975	29854
5.21352	30532
5.21727	29953.7
5.22103	30589
5.2248	30234.1
5.22856	30977.9
5.23232	30048.9
5.23607	30786.5
5.23984	29822
5.2436	30828.2
5.24736	29504.2
5.25112	30548.4
5.25488	29644.1
5.25864	30396.4
5.2624	29776
5.26616	30376.5
5.26992	29715.1
5.27368	30748
5.27744	30112.1
5.2812	30651.5
5.28496	29699.2
5.28872	30495.3
5.29248	29716.6
5.29624	30564.5
5.3	29694.7
5.30376	31044.4
5.30752	29980.6
5.31128	30662.8
5.31504	29802.2
5.3188	30931.5
5.32256	30258.7
5.32632	30795.5
5.33008	29768
5.33384	30223.5
5.3376	29798.3
5.34136	30697.2
5.34512	29777.1
5.34888	30398
5.35264	29888.7
5.3564	30188.8
5.36016	29839.7
5.36392	30610.1
5.36768	29932.4
5.37144	30509.3
5.3752	29507.6
5.37896	30338.8
5.38272	30056.1
5.38648	30650.8
5.39023	29898.1
5.394	30724
5.39776	29836.2
5.40151	30499.6
5.40527	29609.6
5.40904	30316.2
5.4128	29435.7
5.41655	30500.7
5.42031	30030.7
5.42407	30534.6
5.42783	29788.5
5.43159	30709.6
5.43535	29842.2
5.43911	30346.9
5.44287	29882.5
5.44663	30456.1
5.45039	29436.7
5.45415	30480.5
5.45791	29504.1
5.46167	30189.3
5.46543	29590.4
5.46919	30149.7
5.47295	29725.5
5.47671	30061.8
5.48047	29451.1
5.48423	30299.8
5.48799	29456.1
5.49175	30164.5
5.49551	29107
5.49927	29943.6
5.50303	29384.6
5.50679	30298.8
5.51055	29455.5
5.51431	30163.2
5.51807	29367.1
5.52183	29908.2
5.52559	29648.9
5.52935	29754.1
5.5331	29128.5
5.53686	30100.3
5.54062	29197
5.54438	29788.6
5.54814	29316.4
5.5519	29764
5.55566	29670.9
5.55942	30170.3
5.56318	29591.5
5.56694	29851.8
5.5707	29247
5.57446	29565.9
5.57822	29713.9
5.58198	29942.3
5.58574	29589
5.5895	30031.6
5.59326	29327.8
5.59702	29656.5
5.60078	29061.1
5.60454	30059.6
5.6083	29651.2
5.61205	29888.8
5.61581	29151.1
5.61957	29916.1
5.62333	29130.2
5.62709	29650.9
5.63085	28863.3
5.63461	30342.1
5.63837	29213.2
5.64213	29689.2
5.64589	29365
5.64965	29399.9
5.65341	29257.9
5.65717	29722.8
5.66093	29152.9
5.66469	29839.7
5.66845	28900.9
5.6722	29906.9
5.67596	29349.8
5.67972	29511.9
5.68348	28924.9
5.68724	29739.9
5.691	29179.6
5.69476	29640.2
5.69852	29461.8
5.70228	30105.8
5.70604	29049.3
5.7098	29810
5.71356	29083.7
5.71731	29848.3
5.72107	29290.2
5.72483	29569.6
5.72859	29243.6
5.73235	29773.6
5.73611	29565.6
5.73987	29841
5.74363	28969.4
5.74739	29847.9
5.75115	29096.5
5.7549	30190.1
5.75866	29185.3
5.76242	29985.1
5.76618	29090.7
5.76994	29948.8
5.7737	28860.3
5.77746	29717.3
5.78122	29187.3
5.78498	29934.5
5.78874	29023.1
5.79249	30054
5.79625	29091.2
5.80001	29840.8
5.80377	29124.3
5.80753	29788.1
5.81129	29152
5.81505	29657.8
5.81881	28669.9
5.82257	29709.9
5.82632	29168.4
5.83008	29605.4
5.83384	29072.5
5.8376	29584.6
5.84136	28972.9
5.84512	30093
5.84888	28599.1
5.85264	29632.2
5.8564	28938.4
5.86015	29686.4
5.86391	29139.5
5.86767	29959.5
5.87143	28891.3
5.87519	29901.9
5.87895	29509.3
5.88271	29514.5
5.88647	29047.3
5.89022	30067.2
5.89398	28827.2
5.89774	29718.4
5.9015	29228.6
5.90526	30137.3
5.90902	29226.9
5.91278	29436.2
5.91653	29063.2
5.92029	29782.8
5.92405	29099.7
5.92781	29766.1
5.93157	29202.8
5.93533	29774.5
5.93909	29108.2
5.94284	29697.6
5.9466	29259.7
5.95036	29730.1
5.95412	29142.6
5.95788	29954.9
5.96164	29193.6
5.96539	29536.9
5.96915	29472
5.97291	30226.7
5.97667	29601
5.98043	29854.5
5.98419	29645.1
5.98794	29607.8
5.9917	29559
5.99546	29952.2
5.99922	29508
6.00298	29834.6
6.00674	29298.7
6.01049	30094.6
6.01425	29565.6
6.01801	29843.1
6.02177	29452.6
6.02553	29890.3
6.02929	29214.6
6.03304	29701.7
6.0368	29304.8
6.04056	30295.6
6.04432	29384.8
6.04808	30171.1
6.05184	29581.7
6.05559	29736.4
6.05935	29383.9
6.06311	29951.7
6.06687	29241.4
6.07063	29868.6
6.07438	29331.2
6.07814	30313.8
6.0819	29809.7
6.08566	30129.1
6.08942	29320.5
6.09317	30234.4
6.09693	29889.6
6.10069	30094.7
6.10445	29152
6.10821	29814.7
6.11196	29062.8
6.11572	29643.7
6.11948	29076.5
6.12324	29791.7
6.127	29157.4
6.13075	29336.9
6.13451	28735.4
6.13827	29295.3
6.14203	28855.4
6.14579	29369.4
6.14954	28554.6
6.1533	28881.6
6.15706	28452.5
6.16082	29109.4
6.16457	28587.3
6.16833	28908.8
6.17209	28607.6
6.17585	29380.4
6.1796	28489.3
6.18336	29015.5
6.18712	28475.3
6.19088	29023.8
6.19463	28201.9
6.19839	28814
6.20215	28360.2
6.20591	28608.9
6.20967	28320.5
6.21342	28923.6
6.21718	28686.2
6.22094	28929.1
6.2247	28311
6.22845	28917.2
6.23221	28364
6.23597	28839.8
6.23973	28256
6.24348	29158.6
6.24724	28368.7
6.251	29142.8
6.25476	28194.8
6.25851	28904
6.26227	28368
6.26603	28670.8
6.26978	28350.3
6.27354	28764.5
6.2773	28546.4
6.28106	28735.5
6.28482	28337
6.28857	28903.9
6.29233	28215.1
6.29609	28748.4
6.29984	27997.8
6.3036	28935.2
6.30736	28251
6.31112	28795.9
6.31487	28300.4
6.31863	28890.3
6.32239	28253.3
6.32614	28376.1
6.3299	28429.3
6.33366	28811.2
6.33742	28200.8
6.34117	28527.7
6.34493	28167.4
6.34869	28714.7
6.35244	28175
6.3562	28396.2
6.35996	28535.5
6.36372	28689.6
6.36747	28126.7
6.37123	28931
6.37499	27993.7
6.37874	28076.9
6.3825	27990.4
6.38626	28641.4
6.39001	28133.7
6.39377	28395.1
6.39753	27826
6.40128	28745.9
6.40504	27633
6.4088	28677
6.41255	28136.1
6.41631	28454.1
6.42007	27927.2
6.42382	28480.9
6.42758	28256.1
6.43134	28613.4
6.43509	28188.8
6.43885	28696.2
6.44261	27902.9
6.44637	28386.4
6.45012	27907.6
6.45388	28710.4
6.45763	27830.6
6.46139	28905.6
6.46515	28023.6
6.4689	28601
6.47266	28079.2
6.47642	28331.6
6.48017	27838.1
6.48393	28447.1
6.48769	27750.8
6.49144	28514.3
6.4952	27727.7
6.49896	28523.7
6.50271	27883
6.50647	28398
6.51023	27476.3
6.51398	28660.6
6.51774	27607.6
6.52149	28357.9
6.52525	27670.6
6.52901	28226.6
6.53276	27239
6.53652	28233.5
6.54028	27557.7
6.54403	28152.3
6.54779	27800.2
6.55155	28367.8
6.5553	27897.6
6.55906	28020.2
6.56281	27718.8
6.56657	28257.4
6.57033	27981.5
6.57408	27955.9
6.57784	27935.6
6.58159	28295.4
6.58535	27649.5
6.58911	27928.4
6.59286	27336.5
6.59662	27978.1
6.60037	27753.8
6.60413	28296.8
6.60788	27376.7
6.61164	28091.7
6.6154	27793.2
6.61915	28189
6.62291	27601.2
6.62667	27976.4
6.63042	27207.6
6.63418	28165.1
6.63793	27654.2
6.64169	27986.9
6.64544	27619.4
6.6492	28028.1
6.65296	27223.2
6.65671	28068.4
6.66422	28194.9
6.66798	27298.4
6.67173	28062.2
6.67549	27541.5
6.67924	27949.2
6.683	27328.5
6.68676	28278.7
6.69051	27757.8
6.69427	28168.2
6.69802	27451.7
6.70178	27743.2
6.70553	27630.8
6.70929	28025.4
6.71304	27586
6.7168	28004.2
6.72056	27283.6
6.72431	28212.4
6.72807	27555.4
6.73182	27954.6
6.73558	27877.5
6.73933	27996.5
6.74309	27061.2
6.74684	27900
6.7506	27162
6.75435	27984.6
6.75811	27143.1
6.76186	27991
6.76562	27273.6
6.76937	27615
6.77313	27152.2
6.77688	27874.4
6.78064	26959.6
6.78439	27689.5
6.78815	27306.4
6.7919	27944.1
6.79566	27524.9
6.79941	27906.9
6.80317	27105.8
6.80692	28002.7
6.81068	27494.7
6.81443	27519
6.81819	27200
6.82194	27633.6
6.8257	27160.2
6.82945	27726.6
6.83321	27481.5
6.83696	27825.2
6.84072	27350.1
6.84447	27687.5
6.84823	27553.2
6.85198	27898.3
6.85574	27042.7
6.85949	27876.6
6.86325	27093
6.867	27968.3
6.87076	27280.1
6.87451	27976
6.87826	27206.2
6.88202	28072.2
6.88577	27345.4
6.88953	27656.6
6.89328	27138.5
6.89704	27775.8
6.90079	27189.8
6.90455	27749.8
6.9083	27212.1
6.91205	27827.5
6.91581	27349.9
6.91956	27711.1
6.92332	27194.5
6.92707	27668.2
6.93083	27248.6
6.93458	28001.1
6.94209	27639.9
6.9496	27889.6
6.95335	27066.7
6.95711	27757
6.96086	27199.5
6.96462	27932
6.96837	27485.9
6.97018	27300.1
6.97394	27753.5
6.97769	27391.5
6.98145	27720.4
6.9852	26934.1
6.98896	27492.2
6.99272	26986.3
6.99648	27534
7.00023	26560.5
7.00399	27805.1
7.00774	27086.9
7.0115	27852.4
7.01526	26719.4
7.01901	27755.1
7.02277	26965.1
7.02653	27159.5
7.03028	26888.2
7.03404	27347.7
7.03779	27233.3
7.04155	27549.4
7.04531	26906.7
7.04906	27402.3
7.05282	27115.7
7.05657	28266.1
7.06033	27051.5
7.06409	27713.4
7.06784	27357.4
7.0716	27637.5
7.07536	27055.5
7.07911	27131.8
7.08287	26667
7.08662	27448.8
7.09038	27034.5
7.09413	27846.8
7.09789	26890.7
7.10165	27690.4
7.1054	27271.8
7.10916	27534.3
7.11292	26871
7.11667	27417.1
7.12043	27108.3
7.12418	27428.3
7.12794	26683.1
7.13169	27230.1
7.13545	26624.3
7.1392	27485.3
7.14296	26845.2
7.14672	27460
7.15423	27805.7
7.15798	27265.1
7.16174	27503.1
7.16549	27035.9
7.16925	27235.4
7.17301	26673.2
7.17676	27610
7.18052	27154.7
7.18427	27723.9
7.18803	27071.7
7.19178	27544.2
7.19554	26992.4
7.1993	27362.7
7.20305	26512.8
7.20681	27531.5
7.20686	26871.5
7.21061	27468.1
7.21437	26940.2
7.21812	27320.9
7.22187	26838.1
7.22563	27580.1
7.22938	26646.6
7.23314	27645.6
7.23689	26826.6
7.24065	27301.9
7.2444	26796
7.24815	27325.8
7.25191	26880.8
7.25566	27521.7
7.25942	26686.4
7.26317	27156.6
7.26693	26862.5
7.27068	27273.9
7.27444	26662
7.27819	26959
7.28195	26605.1
7.2857	27243.4
7.28945	26558.9
7.29321	26888.8
7.29696	26662.2
7.30072	27130
7.30447	26628.1
7.30823	27176.2
7.31198	26837.9
7.31574	27273.5
7.31949	26491.6
7.32325	27136.3
7.327	26324
7.33076	27391.3
7.33451	26661.9
7.33827	26974.2
7.34202	26594.5
7.34578	27104.4
7.34953	26885.9
7.35328	26912.7
7.35704	26899.1
7.3608	27479.7
7.36455	26791.4
7.36831	27090.4
7.37206	27041.1
7.37582	27078.6
7.37957	26703.4
7.38333	26917.6
7.38708	26775.4
7.39084	27365.3
7.39459	26576.3
7.39835	27062.3
7.4021	26731
7.40586	27098.5
7.40961	26777.5
7.41337	27194.2
7.41712	26591.1
7.42088	27388.5
7.42463	27035.2
7.42839	27101.9
7.43214	26821.9
7.4359	27222.3
7.43965	26940.2
7.44341	27140.2
7.44717	26696.4
7.45092	26855.8
7.45468	26762.6
7.45843	27093.7
7.46219	26580.1
7.46594	27257.4
7.4697	26558.3
7.47345	27038.3
7.47721	26848.9
7.48096	27202.7
7.48472	26584.4
7.48848	27388.4
7.49223	26937.4
7.49599	27076.6
7.49974	26706.4
7.5035	27103.2
7.50725	26578
7.51101	26654.4
7.51476	26596.6
7.51852	27124.7
7.52228	26853.3
7.52603	27147.3
7.52979	26227.1
7.53354	27106.3
7.5373	26322.4
7.54106	27105.2
7.54481	26423.3
7.54857	27180.2
7.55232	26638.3
7.55608	27139
7.55983	26668.9
7.56359	26987.8
7.56735	26572.4
7.5711	27441.4
7.57486	26443.2
7.57862	26680.2
7.58237	26645.8
7.58613	27086.1
7.58988	26276.2
7.59364	26877
7.59739	26254.7
7.60115	26785.2
7.60491	26495.8
7.60866	27045
7.61242	26858
7.61618	27154.4
7.61993	26421.9
7.62369	26923.7
7.62744	26806.9
7.6312	26760.4
7.63496	26177.3
7.63871	27537
7.64247	26155.9
7.64623	27325.1
7.64998	26388.7
7.65374	26760.3
7.65749	26286.4
7.66125	26727.3
7.66501	26484.7
7.66876	26875.5
7.67252	26389.4
7.67628	26812
7.68003	26527.8
7.68379	26831.3
7.68755	26370.9
7.6913	26787.3
7.69506	26368.8
7.69882	26855.7
7.70257	26506.9
7.70633	26818.4
7.71009	26298.2
7.71384	26635.7
7.7176	26160.1
7.72136	26872.5
7.72511	26591.8
7.72887	27029.1
7.73263	26428.6
7.73638	26897
7.74014	26391.3
7.7439	27057.4
7.74765	26489.5
7.75141	26676.4
7.75517	26408.7
7.75892	26797.9
7.76268	26324.8
7.76644	26772
7.7702	26492.2
7.77395	27196
7.77771	26371.7
7.78146	27007.2
7.78522	26310.3
7.78898	26946.7
7.79274	26436.4
7.79649	26522.6
7.80025	26701.4
7.80401	26678.3
7.80776	26294
7.81152	26950.4
7.81528	26532.3
7.81904	26913.6
7.82279	26355.5
7.82655	26652.3
7.83031	26218.5
7.83406	26705.7
7.83782	26103
7.84158	27122
7.84534	26132.3
7.84909	26854.4
7.85285	26371.5
7.85661	26908.5
7.86036	26216.5
7.86412	26933.7
7.86788	26154.5
7.87164	26206.1
7.87539	26009.3
7.87915	26617.7
7.88291	26333.3
7.88666	26856.8
7.89042	26070.7
7.89418	26587.7
7.89794	26190.4
7.90169	26703.3
7.90545	26062
7.90921	26796.3
7.91297	26099.4
7.91672	26866.5
7.92048	26461.3
7.92424	26755.4
7.928	26200.3
7.93175	26739.7
7.93551	26415
7.93927	26590.3
7.94303	25991.9
7.94678	26334.2
7.95054	26112.1
7.9543	26629.9
7.95806	26128.2
7.96181	26788.4
7.96557	26230.4
7.96933	26460.9
7.97309	25880.8
7.97685	26635.2
7.9806	26072.1
7.98436	26420.9
7.98812	25899.6
7.99188	26699
7.99563	26271.1
7.99939	26688.9
8.00315	26258.4
8.00691	26466.6
8.01066	26073
8.01442	26435.2
8.01818	26086.2
8.02194	26506.7
8.0257	25748.4
8.02945	26246.8
8.03321	25750.8
8.03697	26462.4
8.04073	25911.6
8.04449	26625.6
8.04824	26123.2
8.052	26559.5
8.05576	25916.6
8.05952	26548.3
8.06328	26287.8
8.06703	26894.5
8.07079	26153.6
8.07455	26701.4
8.07831	25716.1
8.08207	26516.5
8.08582	25942
8.08958	26386.2
8.09334	26038.3
8.0971	26257.9
8.10086	26123.7
8.10461	26402.2
8.10837	25758.6
8.11213	26401.6
8.11589	26174.4
8.11965	25947.2
8.12341	25756.9
8.12716	26096.1
8.13092	25681.6
8.13468	26685.3
8.13844	25835.2
8.1422	26686.9
8.14596	26239.4
8.14971	26463.9
8.15347	26105.6
8.15723	27039.8
8.16099	26426.6
8.16475	26856.2
8.1685	26360.6
8.17226	27057.6
8.17602	26438.5
8.17978	26908.3
8.18354	26373.1
8.1873	27054.8
8.19106	26478.5
8.19481	26918.2
8.19857	26398.6
8.20233	27283.4
8.20609	26592.6
8.20985	27412.5
8.21361	26951.4
8.21736	26796.9
8.22112	27025
8.22488	27410
8.22864	26989.3
8.2324	27272.3
8.23616	26582.4
8.23992	27244.6
8.24367	26701
8.24743	27332.2
8.25119	26611.3
8.25495	27082.7
8.25871	26688.4
8.26247	26812.5
8.26623	26343.1
8.26998	27101.6
8.27374	26255.4
8.2775	26949.2
8.28126	26298.3
8.28502	26935.3
8.28878	26504.7
8.29254	27061.8
8.2963	26408.4
8.30006	26822.1
8.30381	26268.2
8.30757	26412.2
8.31133	26288
8.31509	26915
8.31885	26421.9
8.32261	26732.1
8.32637	26344.1
8.33013	26600.4
8.33388	26271.7
8.33764	26606.3
8.3414	26176.5
8.34516	26620.5
8.34892	26458
8.35268	26791.5
8.35644	26185.2
8.3602	26649.9
8.36396	26323.7
8.36771	26487.2
8.37147	25925.6
8.37523	27058.6
8.37899	26093.4
8.38275	26589.9
8.38651	26004.5
8.39027	26632.2
8.39403	26572.2
8.39779	26735.5
8.40155	26201.8
8.4053	26890.2
8.40906	26062.3
8.41282	26365
8.41658	25629.7
8.42034	26840.6
8.4241	26027.4
8.42786	26546.3
8.43162	25965.4
8.43538	26546.2
8.43914	25741.9
8.4429	26549.7
8.44665	26297.6
8.45041	26550.9
8.45417	26224.3
8.45793	26599
8.46169	26146.7
8.46545	26342.5
8.46921	25946.7
8.47297	26387.6
8.47673	26100.6
8.48049	26324.1
8.48425	25795.3
8.48801	26076.8
8.49176	25807.1
8.49552	26469.3
8.49928	25938.4
8.50304	26273.5
8.5068	26045.8
8.51056	26197.6
8.51432	26183.7
8.51808	26545.9
8.52184	26054.4
8.5256	26554.3
8.52936	26101.6
8.53312	26320.3
8.53688	25958.7
8.54064	27045.7
8.54439	25821.9
8.54815	26238.7
8.55191	25720.2
8.55567	26702.8
8.55943	25821.4
8.56319	26338.9
8.56695	26165.9
8.57071	26231.4
8.57447	25672.3
8.57823	25951.4
8.58199	25915.4
8.58575	26166
8.58951	25875.2
8.59327	25952.9
8.59703	25658.2
8.60079	26108.5
8.60455	26026.5
8.60831	26041.1
8.61207	25531
8.61583	26144.2
8.61959	25789.3
8.62335	26323
8.62711	25712
8.63087	26022.6
8.63462	25841
8.63838	26344.3
8.64214	25608.8
8.6459	26159.4
8.64966	25583.5
8.65342	26169.5
8.65718	25729.4
8.66094	26486.3
8.6647	25602.4
8.66846	25946.3
8.67222	25563
8.67598	25990.9
8.67974	25651.5
8.6835	26170.6
8.68726	25906
8.69102	26031.5
8.69478	25715.3
8.69854	26099.5
8.7023	25365.5
8.70606	25980
8.70982	25520.5
8.71358	26211.7
8.71734	25705
8.7211	26162.7
8.72486	25961.5
8.72862	26235.6
8.73238	25539.8
8.73614	26189.2
8.7399	25869.3
8.74366	26188.7
8.74742	25658.8
8.75118	26422.9
8.75494	25881.6
8.7587	26060.9
8.76246	25344.4
8.76622	26094.2
8.76998	25652.7
8.77374	26115.9
8.7775	25603.8
8.78126	26241.5
8.78501	25670.6
8.78877	26559.4
8.79254	25773.4
8.7963	26366.2
8.80006	25854.1
8.80382	26225.5
8.80757	25843.6
8.81133	26597.4
8.81509	26101.1
8.81885	26409
8.82262	26258.4
8.82638	26556.4
8.83014	26030.9
8.8339	26502.6
8.83765	26064.3
8.84141	26414.6
8.84517	26116.4
8.84894	26678.2
8.8527	25970.4
8.85646	26768.5
8.86022	26018.3
8.86398	26682.4
8.86773	26039.9
8.87149	26870.6
8.87526	26386.7
8.87902	27004.2
8.88278	26059
8.88654	27028.2
8.8903	26327
8.89406	27123.4
8.89782	26754.6
8.90158	26907
8.90534	27088
8.9091	27023.4
8.91286	27309.5
8.91662	27743.6
8.92038	26841.4
8.92414	27605
8.9279	27293.6
8.93166	28083.1
8.93542	27870
8.93918	28076.6
8.94294	28259.6
8.9467	29088.7
8.95046	28565.9
8.95422	29104.9
8.95798	29139.3
8.96174	30039.2
8.9655	29688.9
8.96926	30719.7
8.97302	30596.6
8.97678	31397.4
8.98054	31115.7
8.9843	32253.2
8.98806	31973.9
8.99182	32547.3
8.99558	32356
8.99934	32938
9.0031	32485.5
9.00686	33459.3
9.01062	32941.9
9.01438	33267.6
9.01814	32755.6
9.0219	32598.8
9.02566	32272.6
9.02942	32054.3
9.03318	30958.6
9.03694	31165.1
9.04071	30214
9.04447	30384.1
9.04823	29144.7
9.05199	29622.3
9.06703	28508
9.07079	27567.4
9.07455	27805.3
9.07831	27013.2
9.08207	27491.2
9.08583	27162.7
9.08959	27160.5
9.09335	26887.1
9.09711	26762.3
9.10087	26398.6
9.10463	26973.7
9.10839	26270.7
9.11215	26484.7
9.11591	26366.8
9.11967	26168.1
9.12343	25939.5
9.12719	26249.5
9.13095	25827.1
9.13471	26106.4
9.13847	25784.1
9.14223	26178.7
9.14599	25863.8
9.14976	26070.7
9.15352	25192.8
9.15728	25892
9.16104	25364.9
9.1648	26163.6
9.16856	25583.8
9.17232	25724
9.17608	25450.7
9.17984	26069.6
9.1836	25395.9
9.18736	25762.2
9.19112	25194.3
9.19488	25876.6
9.19864	25269.5
9.2024	25679.3
9.20616	25424.2
9.20992	25730.4
9.21368	25269.7
9.21744	26050.5
9.2212	24809.8
9.22496	25897.3
9.22873	24954.9
9.23249	25203.6
9.23625	25060.8
9.24001	25617.8
9.24377	24999.1
9.24753	25592.5
9.25129	25168.2
9.25505	25543.6
9.25881	24785.2
9.26257	25467
9.26633	25186.6
9.27009	25643.9
9.27385	25206.9
9.27761	25696.9
9.28137	25263.4
9.28513	25940.5
9.2889	25689.7
9.29265	25908.4
9.29641	25135.2
9.30018	25594.2
9.30394	25412.1
9.3077	25702.8
9.31146	25256.9
9.31522	25518
9.31898	25324.4
9.32274	25619.6
9.3265	25452.1
9.33026	25670.7
9.33402	25367.1
9.33778	25373.3
9.34154	25199.2
9.3453	25720.9
9.34906	25040.7
9.35282	25199.6
9.35659	25052.7
9.36035	25749.4
9.36411	25219.2
9.36787	25327.6
9.37163	25207.6
9.37539	25366.8
9.37915	24969.3
9.38291	25372
9.38667	25109.9
9.39043	25825.7
9.39419	24897.9
9.39795	25719.4
9.40171	24898
9.40547	25512.8
9.40923	25164.1
9.41299	25208.8
9.41676	25212.7
9.42052	25337.2
9.42428	24907.1
9.42804	25380.8
9.4318	24906.9
9.43556	25919.4
9.43932	24934.9
9.44308	25712.1
9.44684	25039.7
9.4506	25638.3
9.45436	25627.1
9.45812	25843.8
9.46188	25750.1
9.46564	25868.1
9.4694	25780.7
9.47316	25829.6
9.47692	25614.1
9.48068	26724
9.48445	26540.9
9.48821	27033.9
9.49197	27390.7
9.49573	28499.7
9.49949	28831.5
9.50325	29641.2
9.50701	29523.7
9.51077	29759.4
9.51453	29393.9
9.51829	29768.8
9.52205	28739.8
9.52581	29209.8
9.52957	28682.6
9.53333	28769.2
9.5371	28263.1
9.54086	28382.1
9.54462	28060
9.54838	28473.7
9.55214	27573.4
9.5559	28237.9
9.55966	27692.8
9.56342	27975.7
9.56718	27158.1
9.57094	28121.9
9.5747	26917.8
9.57846	27777.4
9.58222	27396.3
9.58598	27550.2
9.58975	27283.7
9.59351	27578.2
9.59727	26961.5
9.60103	27617.3
9.60479	27136.4
9.60855	27707.9
9.61231	26937.3
9.61607	27164.3
9.61983	27233.6
9.62359	27977.4
9.62735	26888.5
9.63111	27421.2
9.63487	27240.1
9.63863	27359.4
9.64239	26762.5
9.64615	27342.1
9.64992	27080.2
9.65368	26956.7
9.65744	26990.5
9.6612	27465.7
9.66496	26768
9.66872	27178.2
9.67248	26516.5
9.67624	27562.9
9.68	26872.9
9.68376	27080.5
9.68752	26804.8
9.69128	27025.9
9.69504	26748.1
9.6988	27240.6
9.70256	26634
9.70633	27353.1
9.71009	26666.4
9.71385	27591.7
9.71761	27268.4
9.72137	27526.3
9.72513	27100
[truncated: 16,043 more rows]
